# Supplementary material for: Simple preparation method for Styrofoam–TiO2 composites and their photocatalytic application for dye oxidation and Cr(vi) reduction in industrial wastewater
Source: Royal Society of Chemistry journal article supplement (doi:10.1039/d0ew00787k), 2020-11-24
Supplement: d0ew00787k1.pdf [file d0ew00787k1.pdf]

## Supplementary data

### **Simple preparation method for Styrofoam-TiO<sub>2</sub> composites and their photocatalytic application for dye oxidation and Cr(VI) reduction in industrial wastewater**

Youn-Jun Lee <sup>a</sup>, Chang-Gu Lee <sup>a,\*</sup>, Jin-Kyu Kang <sup>b</sup>, Seong-Jik Park <sup>c</sup>, Pedro J.J. Alvarez <sup>d</sup>

<sup>a</sup> *Department of Environmental and Safety Engineering, Ajou University, Suwon 16499, Republic of Korea*

<sup>b</sup> *Environmental Functional Materials and Water Treatment Laboratory, Seoul National University, Seoul, Republic of Korea*

<sup>c</sup> *Department of Bioresources and Rural System Engineering, Hankyong National University, Anseong, Republic of Korea*

<sup>d</sup> *Department of Civil and Environmental Engineering, Rice University, Houston, TX 77005, United States of America*

\* Department of Environmental and Safety Engineering, Ajou University, Suwon 16499, South Korea. Tel.: +82 31 219 2405.

*E-mail:* changgu@ajou.ac.kr (C.-G. Lee)

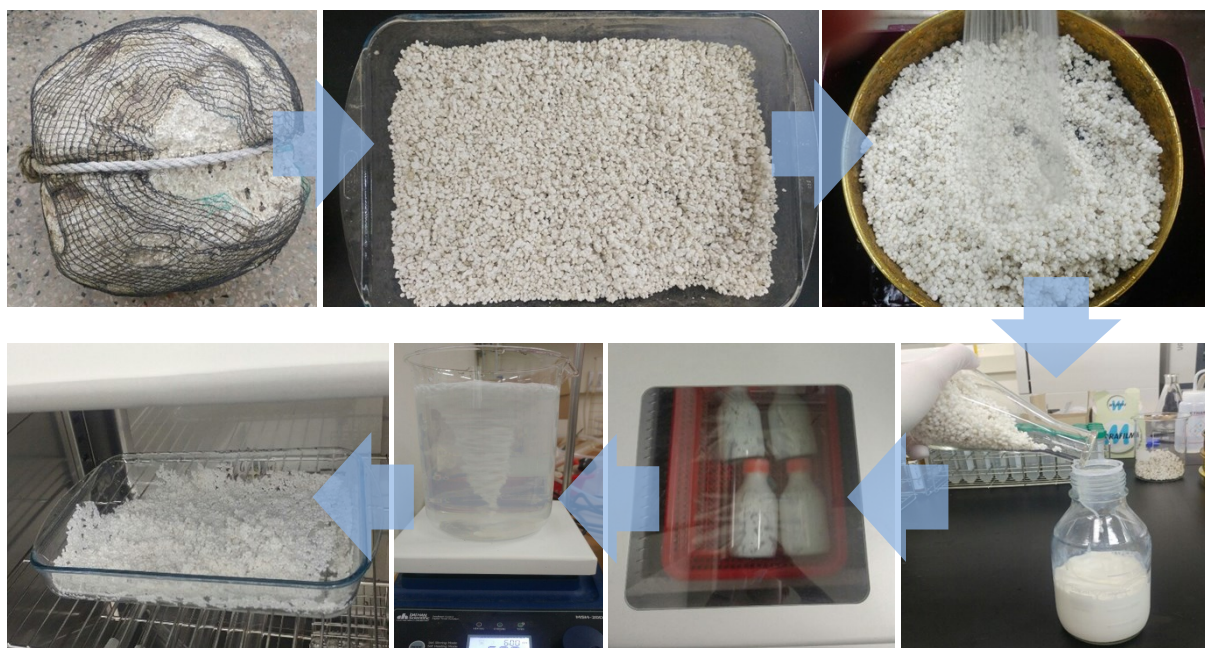

**Fig. S1.** Procedure for the production of W-TiEPS from the wasted expanded polystyrene in a fishing net float.

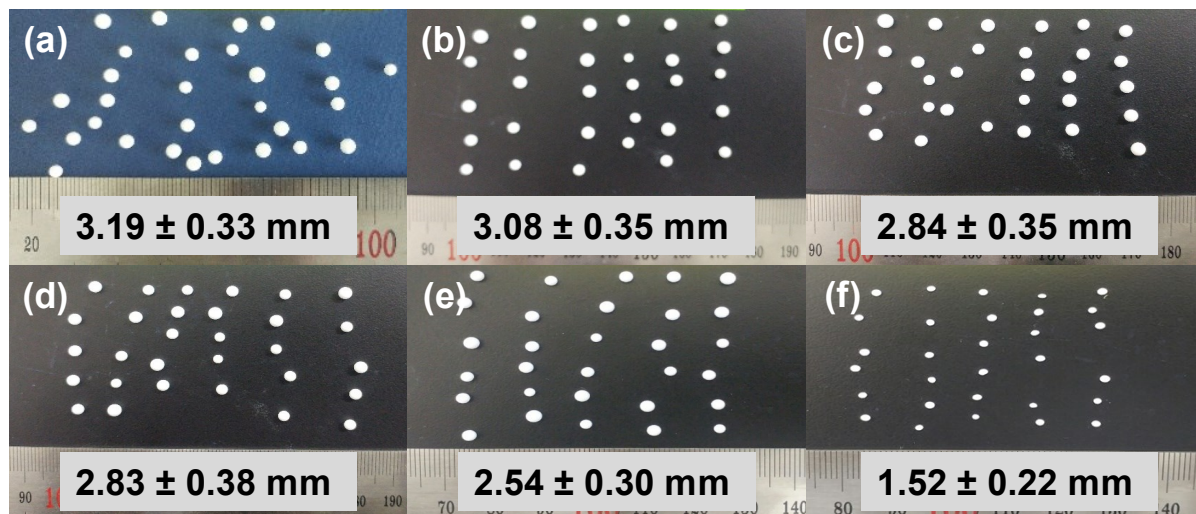

**Fig. S2.** Size comparison of EPS-TiO<sub>2</sub> composites ( $n = 30$ ) prepared in solutions containing different volume percentages of acetone (v/v): (a) pristine EPS balls, (b) 10%, (c) 30%, (d) 50%, (e) 70%, and (f) 90%.

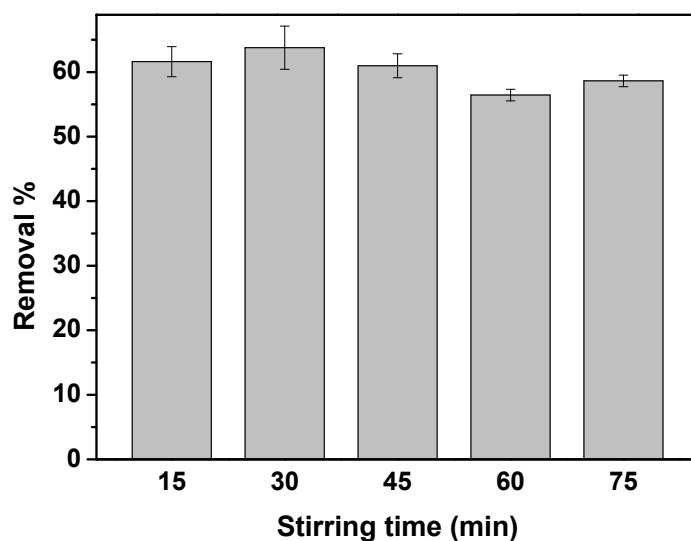

**Fig. S3.** Effect of stirring time using diluted solvent on the photocatalytic activity of EPS-TiO<sub>2</sub> composites. Photocatalytic experimental conditions: initial dye concentration = 5  $\mu$ M; catalyst dose: 1.6 g/L; irradiation time = 60 min; light intensity =  $3.93 \times 10^{-9}$  einstein/cm<sup>2</sup>/s. Data are plotted as mean of replicates and error bars represent range of observed values.

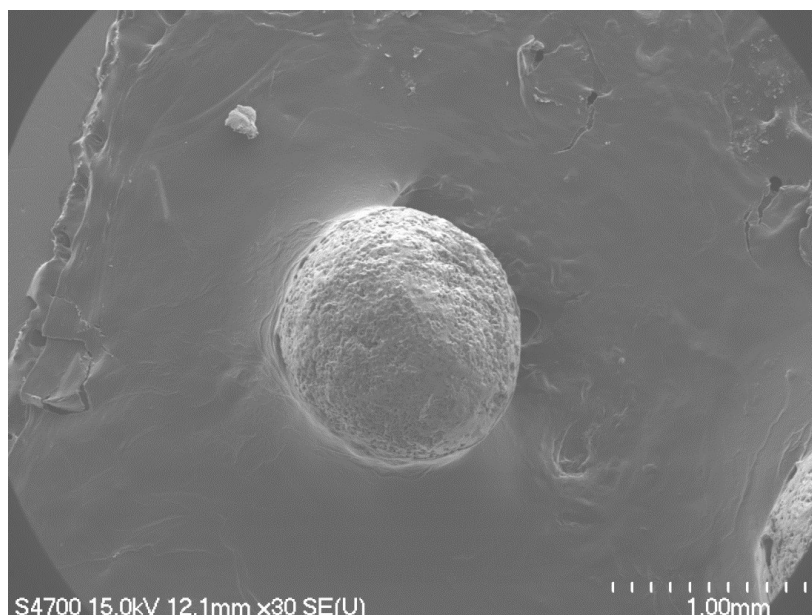

**Fig. S4.** FE-SEM image ( $\times 30$ ) of EPS-TiO<sub>2</sub> composite prepared using a diluted solvent containing 90% (v/v) acetone and 4% (w/v) TiO<sub>2</sub>.

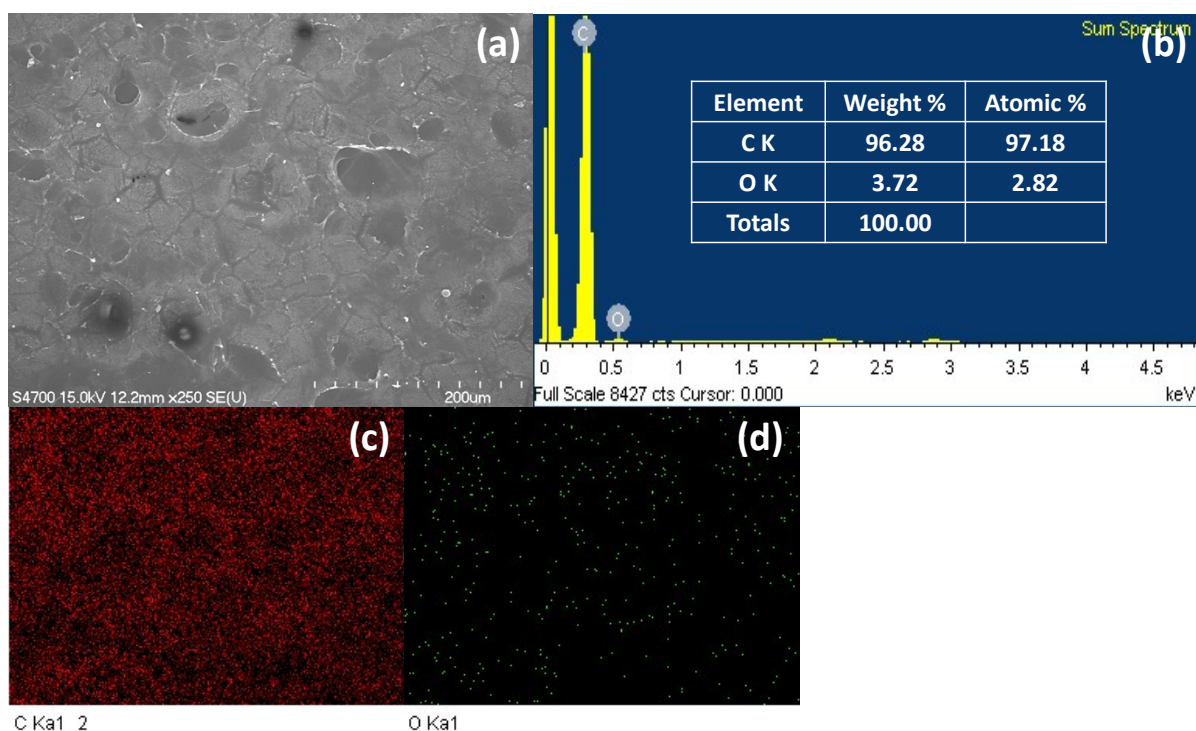

**Fig. S5.** (a) Surface SEM image ( $\times 250$ ), (b) elemental analysis by EDS, and EDS mappings of (c) C and (d) O of a pristine EPS ball.

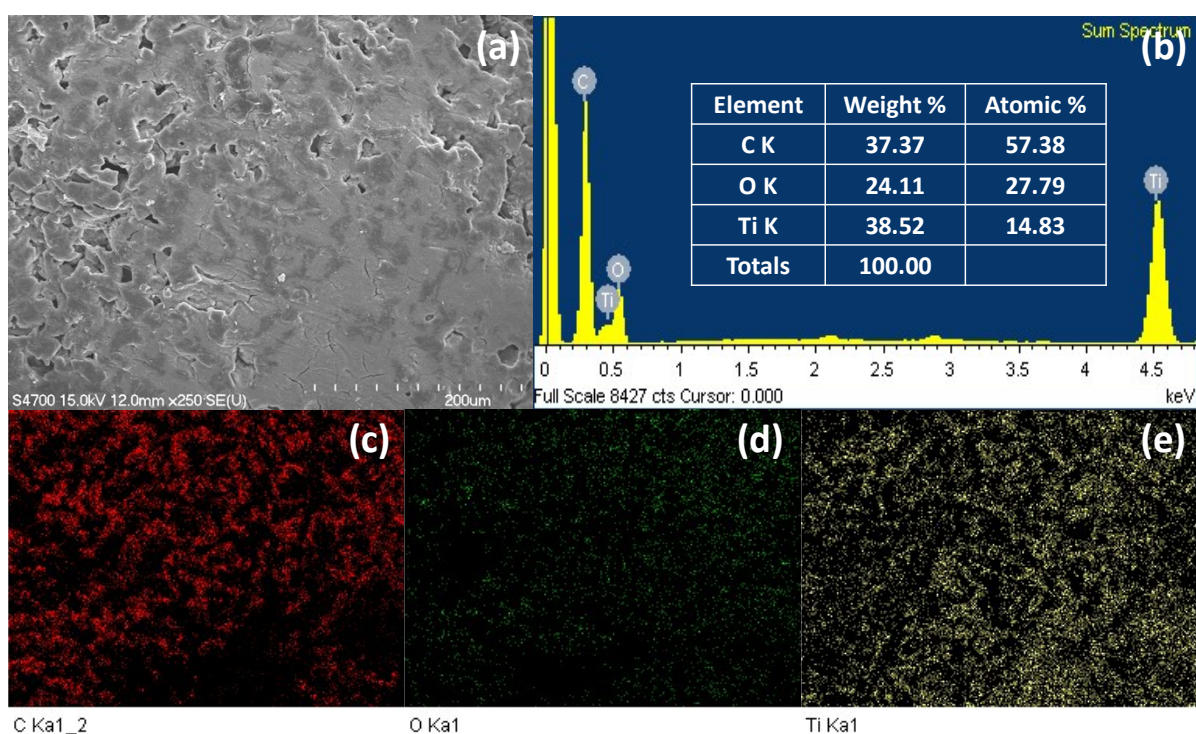

**Fig. S6.** EPS-TiO<sub>2</sub> composite prepared using a diluted solvent containing 90% (v/v) acetone and 4% (w/v) TiO<sub>2</sub>: (a) surface SEM image ( $\times 250$ ), (b) elemental analysis by EDS, and EDS mappings of (c) C, (d) O, and (e) Ti.

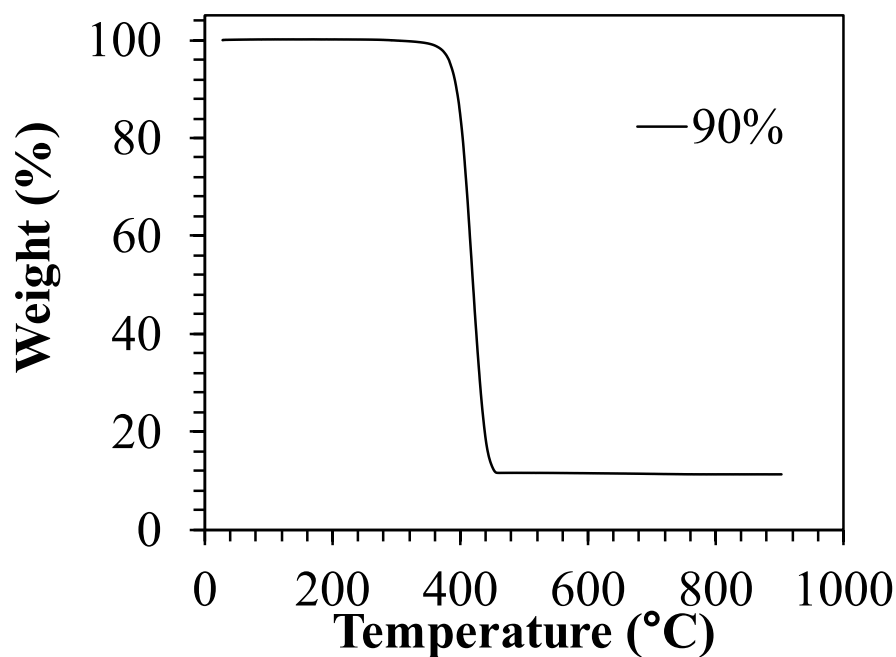

**Fig. S7.** TGA analysis of the EPS-TiO<sub>2</sub> composite prepared using a diluted solvent containing 90% (v/v) acetone and 4% (w/v) TiO<sub>2</sub>.

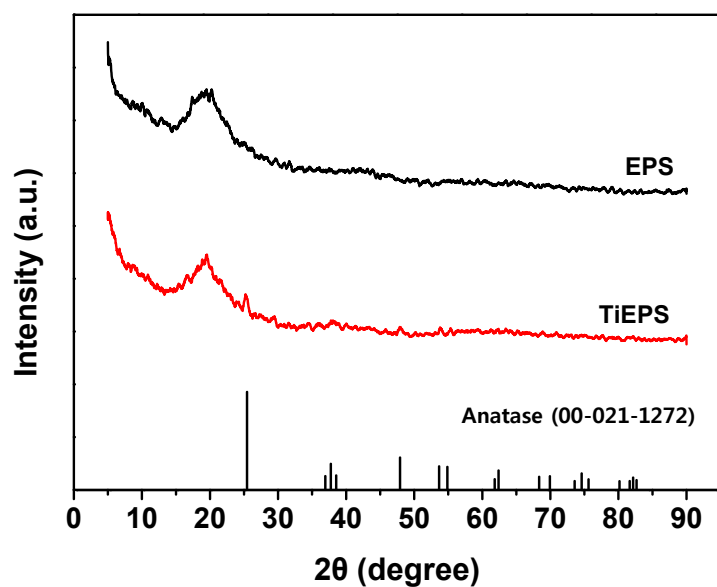

**Fig. S8.** XRD patterns of the pristine EPS and EPS-TiO<sub>2</sub> composite.

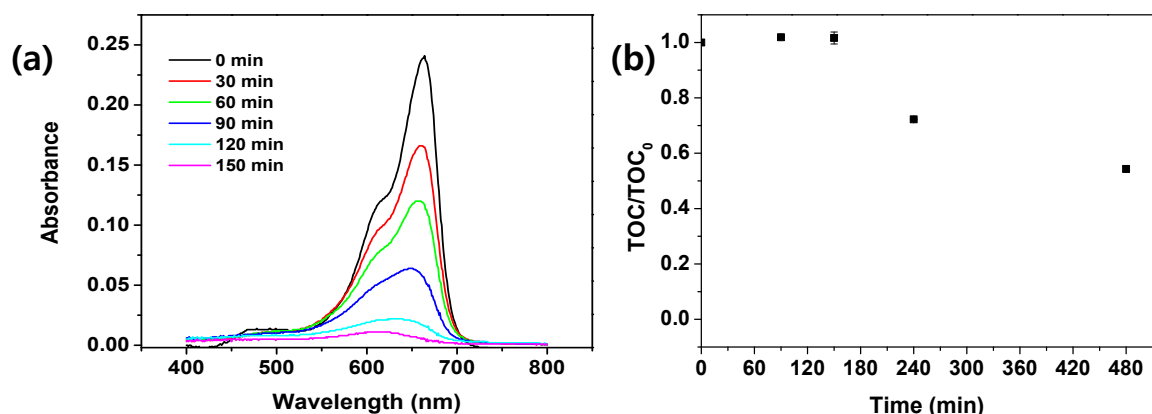

**Fig. S9.** Change in (a) UV-Vis spectrum of methylene blue and (b) TOC during photocatalytic removal of methylene blue dye. Photocatalytic experimental conditions: initial dye concentration = 5  $\mu\text{M}$ ; catalyst dose: 1.6 g/L; light intensity =  $3.93 \times 10^{-9}$  einstein/ $\text{cm}^2/\text{s}$ . Data are plotted as mean of replicates and error bars represent range of observed values.

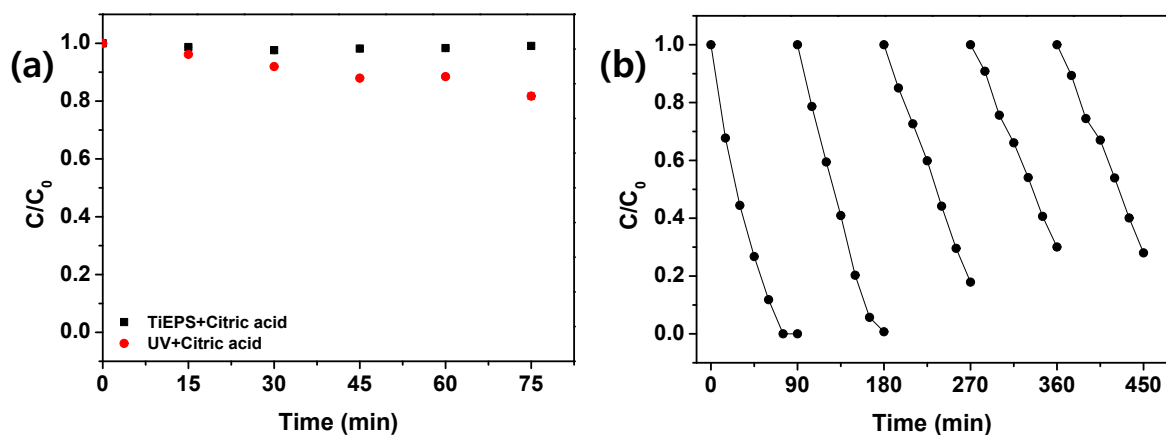

**Fig. S10.** (a) Cr(VI) removal by W-TiEPS under dark and UV irradiation in the presence of citric acid; (b) Photocatalytic reduction of Cr(VI) by W-TiEPS under UV irradiation during 5 reuse cycles (initial Cr(VI) concentration = 8.442 mg/L; catalyst dose: 2.0 g/L; citric acid concentration = 0.4 mM; light intensity =  $3.93 \times 10^{-9}$  einstein/ $\text{cm}^2/\text{s}$ ). Data are plotted as mean of replicates and error bars represent range of observed values.

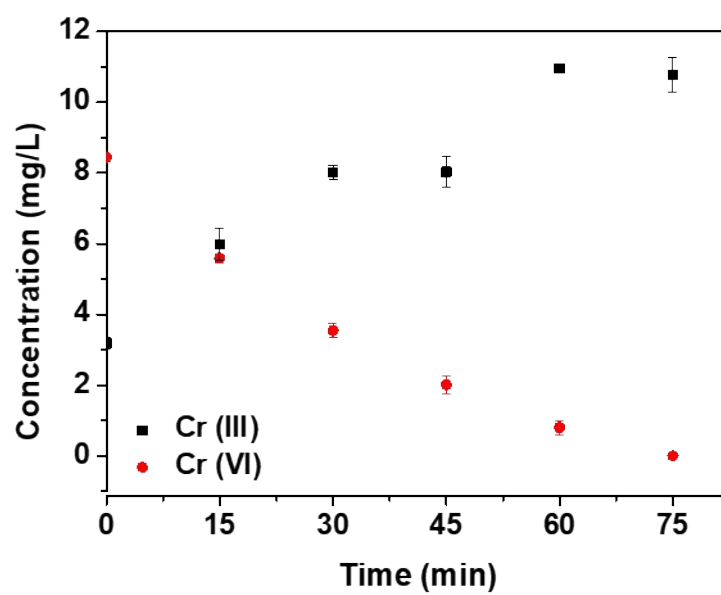

**Fig. S11.** Cr(VI) and Cr(III) concentration by W-TiEPS under UV irradiation

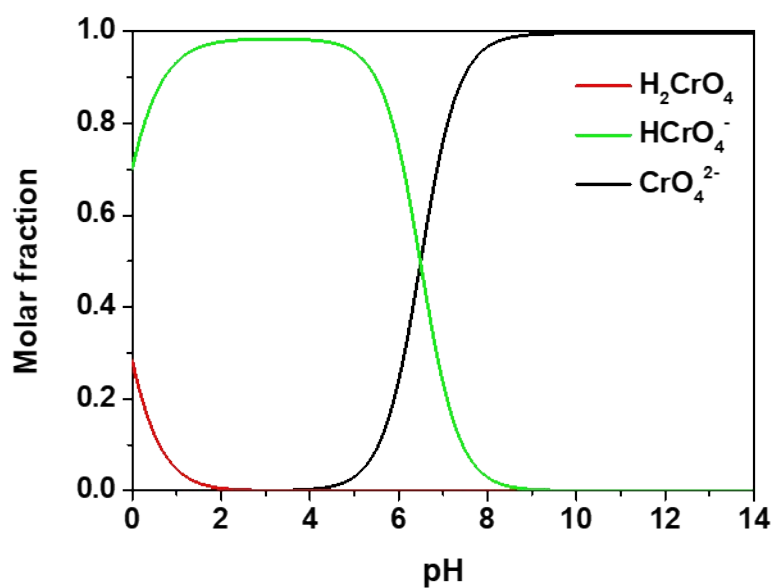

**Fig. S12.** Chromium speciation as a function of solution pH under experimental conditions simulated with visual MINTEQ 3.0

**Table S1**

Chemical composition of industrial Cr(VI) plating wastewater.

| Total Cr        | Cr(VI)                       | Cu <sup>2+</sup>              | Ni <sup>2+</sup>              | Fe <sup>2+</sup> | Ca <sup>2+</sup> |
|-----------------|------------------------------|-------------------------------|-------------------------------|------------------|------------------|
| (mg/L)          | (mg/L)                       | (mg/L)                        | (mg/L)                        | (mg/L)           | (mg/L)           |
| 1187.37         | 844.20                       | 11.22                         | 32.74                         | 4.54             | 31.55            |
| Cl <sup>-</sup> | NO <sub>3</sub> <sup>-</sup> | SO <sub>4</sub> <sup>2-</sup> | PO <sub>4</sub> <sup>3-</sup> | pH               | DOC              |
| (mg/L)          | (mg/L)                       | (mg/L)                        | (mg/L)                        | ( - )            | (mg/L)           |
| 567.95          | 639.79                       | 2920.08                       | 585.42                        | 1.93             | 47.85            |
